# Supplementary material for: Immunogenicity of adenovirus-vector vaccine targeting hepatitis B virus: non-clinical safety assessment in non-human primates
Source: Springer Nature journal article supplement (doi:10.1186/s12985-018-1026-3), 2018-07-24
Supplement: MOESM1 [file 15975132]

**Additional file 1: Table S1 Effects of Ad-HBV administration on Hematology**

| Parameter | Time (d) | Vehicle    | Low-dose                         | Mid-dose                          | High-dose                         | Ad5-null control                  |
|-----------|----------|------------|----------------------------------|-----------------------------------|-----------------------------------|-----------------------------------|
|           |          |            | 1.0×10 <sup>9</sup><br>VP/animal | 1.0×10 <sup>10</sup><br>VP/animal | 1.0×10 <sup>11</sup><br>VP/animal | 1.0×10 <sup>11</sup><br>VP/animal |
| WBC       | d-5      | 14.08±4.18 | 12.76±3.33                       | 10.78±3.22                        | 12.17±2.71                        | 13.60±2.30                        |
|           | d21      | 10.46±2.53 | 8.81±2.60                        | 8.56±2.61                         | 10.37±3.14                        | 8.16±1.80                         |
|           | d44      | 12.97±2.66 | 11.67±3.60                       | 10.37±2.75                        | 9.55±2.83*                        | 9.55±2.37*                        |
|           | d67      | 16.39±2.49 | 12.93±4.86                       | 10.91±3.01                        | 10.18±2.72                        | 11.39±1.54                        |
| RBC       | d-5      | 5.25±0.53  | 5.39±0.56                        | 5.30±0.46                         | 5.31±0.50                         | 5.29±0.27                         |
|           | d21      | 5.49±0.27  | 5.39±0.39                        | 5.41±0.29                         | 5.44±0.35                         | 5.39±0.26                         |
|           | d44      | 5.83±0.33  | 5.72±0.35                        | 5.58±0.37                         | 5.62±0.31                         | 5.58±0.27                         |
|           | d67      | 5.71±0.22  | 5.52±0.19                        | 5.61±0.52                         | 5.71±0.60                         | 5.62±0.49                         |
| HGB       | d-5      | 125±12     | 128±12                           | 127±12                            | 126±12                            | 126±8                             |
|           | d21      | 133±10     | 131±8                            | 132±7                             | 131±8                             | 130±5                             |
|           | d44      | 141±8      | 138±6                            | 136±11                            | 134±7                             | 135±6                             |
|           | d67      | 134±4      | 132±2                            | 133±15                            | 132±12                            | 133±13                            |
| HCT       | d-5      | 39.7±3.9   | 40.7±3.7                         | 40.3±3.6                          | 40.1±3.4                          | 40.2±2.5                          |
|           | d21      | 42.0±3.1   | 40.3±2.4                         | 40.5±2.0                          | 40.6±2.8                          | 40.5±1.6                          |
|           | d44      | 43.6±2.6   | 42.4±2.0                         | 41.7±2.7                          | 41.1±2.2                          | 41.9±1.7                          |
|           | d67      | 45.5±3.5   | 43.7±1.4                         | 44.0±5.5                          | 44.4±3.3                          | 44.5±3.6                          |
| MCV       | d-5      | 75.7±4.1   | 75.7±3.7                         | 76.0±2.6                          | 75.7±3.0                          | 75.9±2.5                          |
|           | d21      | 76.5±4.4   | 74.8±2.5                         | 75.0±3.3                          | 74.7±3.5                          | 75.3±2.5                          |
|           | d44      | 74.9±3.6   | 74.3±2.4                         | 74.8±3.3                          | 73.3±3.1                          | 75.3±1.9                          |
|           | d67      | 79.5±4.4   | 79.2±0.4                         | 78.2±4.1                          | 78.1±3.9                          | 79.4±3.1                          |
| MCH       | d-5      | 23.8±1.3   | 23.9±1.1                         | 24.0±1.0                          | 23.7±1.2                          | 23.8±0.7                          |
|           | d21      | 24.3±1.3   | 24.3±1.0                         | 24.4±1.0                          | 24.1±1.2                          | 24.1±0.7                          |
|           | d44      | 24.3±1.4   | 24.2±1.0                         | 24.3±1.0                          | 23.9±1.2                          | 24.2±0.8                          |
|           | d67      | 23.4±0.7   | 23.9±0.6                         | 23.7±0.5                          | 23.3±1.8                          | 23.7±1.2                          |
| MCHC      | d-5      | 314±8      | 316±10                           | 315±11                            | 313±14                            | 313±7                             |
|           | d21      | 318±10     | 325±10                           | 325±13                            | 322±15                            | 320±9                             |
|           | d44      | 324±10     | 326±9                            | 325±14                            | 326±12                            | 321±7                             |
|           | d67      | 295±16     | 302±7                            | 304±14                            | 298±14                            | 299±11                            |
| RDW       | d-5      | 14.1±1.6   | 13.5±0.8                         | 13.7±0.9                          | 14.2±0.7                          | 14.0±0.9                          |
|           | d21      | 13.4±0.8   | 12.8±0.8                         | 13.2±0.7                          | 13.2±0.7                          | 13.3±0.8                          |
|           | d44      | 12.2±0.4   | 11.8±0.7                         | 12.0±0.5                          | 12.1±0.6                          | 12.3±0.5                          |
|           | d67      | 12.2±0.2   | 11.8±0.5                         | 11.9±0.5                          | 11.9±0.4                          | 12.1±0.4                          |
| PLT       | d-5      | 416±72     | 417±116                          | 356±67                            | 384±100                           | 359±73                            |
|           | d21      | 483±72     | 462±129                          | 461±105                           | 434±98                            | 424±95                            |
|           | d44      | 428±81     | 405±93                           | 400±94                            | 371±78                            | 359±76                            |
|           | d67      | 456±71     | 434±108                          | 368±122                           | 332±82                            | 362±79                            |
| MPV       | d-5      | 9.6±0.8    | 9.1±1.0                          | 9.8±1.3                           | 9.4±0.9                           | 10.0±1.0                          |
|           | d21      | 9.1±0.9    | 8.6±0.7                          | 9.4±1.1                           | 9.3±0.7                           | 9.8±1.2                           |
|           | d44      | 9.3±0.9    | 9.0±0.7                          | 9.5±1.1                           | 9.0±0.5                           | 9.8±1.4                           |

| Parameter | Time (d) | Vehicle   | Low-dose                         | Mid-dose                          | High-dose                         | Ad5-null control                  |
|-----------|----------|-----------|----------------------------------|-----------------------------------|-----------------------------------|-----------------------------------|
|           |          |           | 1.0×10 <sup>9</sup><br>VP/animal | 1.0×10 <sup>10</sup><br>VP/animal | 1.0×10 <sup>11</sup><br>VP/animal | 1.0×10 <sup>11</sup><br>VP/animal |
|           | d67      | 9.4±0.9   | 9.0±0.8                          | 10.1±1.9                          | 9.5±1.0                           | 10.0±2.0                          |
| PDW       | d-5      | 46.6±3.3  | 45.3±5.6                         | 47.4±6.3                          | 48.0±3.9                          | 50.6±5.5                          |
|           | d21      | 47.8±4.3  | 46.2±3.6                         | 47.1±6.6                          | 45.5±2.3                          | 51.1±4.8                          |
|           | d44      | 47.8±5.2  | 47.2±4.3                         | 48.8±7.3                          | 48.2±3.1                          | 53.8±5.2                          |
|           | d67      | 48.7±2.7  | 47.6±5.9                         | 52.7±9.2                          | 49.1±3.9                          | 52.6±4.9                          |
| PCT       | d-5      | 0.40±0.05 | 0.38±0.10                        | 0.34±0.06                         | 0.36±0.08                         | 0.36±0.06                         |
|           | d21      | 0.43±0.05 | 0.39±0.10                        | 0.43±0.08                         | 0.40±0.09                         | 0.41±0.08                         |
|           | d44      | 0.39±0.05 | 0.36±0.07                        | 0.37±0.06                         | 0.33±0.06                         | 0.35±0.06                         |
|           | d67      | 0.42±0.04 | 0.39±0.10                        | 0.35±0.05                         | 0.31±0.05                         | 0.35±0.05                         |
| %NEUT     | d-5      | 48.9±9.8  | 44.7±13.6                        | 43.2±12.8                         | 48.5±16.0                         | 50.4±9.9                          |
|           | d21      | 36.3±10.4 | 27.6±8.0                         | 31.9±10.1                         | 45.0±15.6                         | 35.1±6.8                          |
|           | d44      | 34.2±5.6  | 33.0±9.8                         | 37.4±13.8                         | 36.5±14.4                         | 39.8±10.4                         |
|           | d67      | 43.2±10.1 | 30.8±10.6                        | 31.3±9.7                          | 33.3±14.3                         | 38.9±10.3                         |
| %LYMPH    | d-5      | 45.7±9.4  | 49.9±13.2                        | 45.3±12.5                         | 45.4±15.4                         | 44.8±9.3                          |
|           | d21      | 56.8±9.8  | 65.5±8.7                         | 60.5±8.6                          | 48.9±14.5                         | 59.2±6.5                          |
|           | d44      | 58.6±5.0  | 61.1±10.0                        | 55.5±12.5                         | 55.3±13.4                         | 54.9±9.5                          |
|           | d67      | 50.2±9.0  | 64.9±10.6                        | 61.9±8.7                          | 61.4±14.5                         | 56.5±10.2                         |
| %MONO     | d-5      | 3.1±0.5   | 3.1±0.5                          | 9.6±16.1                          | 3.9±1.5                           | 3.0±0.8                           |
|           | d21      | 4.0±1.3   | 3.3±0.9                          | 4.6±1.3                           | 3.7±1.5                           | 3.2±1.0                           |
|           | d44      | 3.8±0.9   | 3.2±0.7                          | 4.9±1.3                           | 5.7±2.3                           | 3.7±1.1                           |
|           | d67      | 3.5±0.2   | 2.6±0.3                          | 4.4±1.0                           | 3.3±1.3                           | 3.2±1.4                           |
| %EOS      | d-5      | 1.5±1.7   | 1.7±1.6                          | 1.3±1.1                           | 1.5±1.8                           | 1.2±0.7                           |
|           | d21      | 2.1±1.6   | 2.7±2.0                          | 2.3±2.4                           | 1.7±1.2                           | 1.6±1.2                           |
|           | d44      | 2.6±2.7   | 1.9±1.3                          | 1.6±1.7                           | 1.8±2.0                           | 0.9±0.5                           |
|           | d67      | 2.4±2.1   | 1.0±0.6                          | 1.8±1.2                           | 1.5±0.9                           | 0.8±0.7                           |
| %BASO     | d-5      | 0.2±0.1   | 0.2±0.0                          | 0.2±0.1                           | 0.2±0.1                           | 0.2±0.1                           |
|           | d21      | 0.2±0.1   | 0.3±0.1                          | 0.2±0.1                           | 0.2±0.1                           | 0.3±0.1                           |
|           | d44      | 0.2±0.1   | 0.2±0.1                          | 0.2±0.1                           | 0.2±0.1                           | 0.2±0.1                           |
|           | d67      | 0.3±0.1   | 0.3±0.1                          | 0.3±0.1                           | 0.2±0.1                           | 0.2±0.1                           |
| %LUC      | d-5      | 0.6±0.2   | 0.5±0.2                          | 0.4±0.1                           | 0.5±0.2                           | 0.5±0.2                           |
|           | d21      | 0.6±0.2   | 0.6±0.1                          | 0.5±0.2                           | 0.5±0.2                           | 0.7±0.2                           |
|           | d44      | 0.6±0.2   | 0.5±0.1                          | 0.4±0.2                           | 0.5±0.2                           | 0.5±0.2                           |
|           | d67      | 0.6±0.2   | 0.5±0.1                          | 0.4±0.2                           | 0.4±0.1                           | 0.5±0.2                           |
| %RETIC    | d-5      | 2.32±1.43 | 2.07±0.47                        | 2.09±0.64                         | 2.24±0.71                         | 2.01±0.46                         |
|           | d21      | 1.77±0.52 | 1.71±0.56                        | 1.77±0.52                         | 1.48±0.42                         | 1.68±0.22                         |
|           | d44      | 1.02±0.33 | 1.14±0.31                        | 1.22±0.42                         | 1.03±0.36                         | 1.19±0.37                         |
|           | d67      | 1.22±0.11 | 0.90±0.16                        | 1.13±0.11                         | 0.82±0.16                         | 1.14±0.42                         |

<sup>a</sup>Data expressed as mean ± SD.

\*  $p < 0.05$  compared with the vehicle control.
