# Supplementary material for: Immunogenicity of adenovirus-vector vaccine targeting hepatitis B virus: non-clinical safety assessment in non-human primates
Source: Springer Nature journal article supplement (doi:10.1186/s12985-018-1026-3), 2018-07-24
Supplement: MOESM2 [file 15975132]

**Additional file 2: Table S2 Effects of Ad-HBV administration on serum chemistry**

| Parameter | Time (d) | Vehicle     | Low-dose                         | Mid-dose                          | High-dose                         | Ad5-null control                  |
|-----------|----------|-------------|----------------------------------|-----------------------------------|-----------------------------------|-----------------------------------|
|           |          |             | 1.0×10 <sup>9</sup><br>VP/animal | 1.0×10 <sup>10</sup><br>VP/animal | 1.0×10 <sup>11</sup><br>VP/animal | 1.0×10 <sup>11</sup><br>VP/animal |
| ALT       | d-5      | 92.6±57.6   | 77.3±39.7                        | 82.9±61.3                         | 72.7±23.8                         | 90.6±47.5                         |
|           | d21      | 54.1±13.2   | 59.1±31.5                        | 54.4±17.8                         | 76.5±47.1                         | 87.2±50.0                         |
|           | d44      | 70.1±28.6   | 77.9±42.0                        | 60.4±21.3                         | 82.1±58.6                         | 98.2±53.8                         |
|           | d67      | 57.8±11.1   | 54.0±23.3                        | 77.3±69.5                         | 84.5±65.8                         | 162.5±140.5                       |
| AST       | d-5      | 63.2±21.0   | 66.8±24.8                        | 60.3±15.7                         | 60.5±10.0                         | 54.8±11.7                         |
|           | d21      | 51.1±7.8    | 63.1±18.7                        | 52.6±13.9                         | 53.9±13.9                         | 49.1±11.1                         |
|           | d44      | 44.3±10.4   | 53.0±17.5                        | 43.7±7.6                          | 45.1±13.4                         | 39.8±7.6                          |
|           | d67      | 37.7±2.4    | 47.4±15.5                        | 33.4±11.5                         | 45.0±13.3                         | 43.0±14.6                         |
| GGT       | d-5      | 72.4±16.7   | 80.0±27.6                        | 76.5±24.3                         | 78.7±17.5                         | 93.8±29.4                         |
|           | d21      | 70.9±25.5   | 75.7±29.7                        | 77.2±29.0                         | 77.6±25.7                         | 88.5±27.9                         |
|           | d44      | 78.0±26.6   | 82.8±29.9                        | 84.0±34.3                         | 83.7±25.6                         | 93.9±26.1                         |
|           | d67      | 83.4±37.3   | 79.5±8.1                         | 96.3±43.8                         | 104.6±30.9                        | 102.6±43.7                        |
| ALP       | d-5      | 391.4±165.0 | 435.9±186.9                      | 384.3±106.8                       | 403.0±112.3                       | 418.0±102.7                       |
|           | d21      | 341.3±161.3 | 419.3±195.0                      | 349.1±83.8                        | 408.3±174.9                       | 380.6±103.3                       |
|           | d44      | 391.4±202.3 | 453.1±272.9                      | 392.7±153.1                       | 423.3±194.1                       | 403.3±130.8                       |
|           | d67      | 358.0±234.7 | 520.8±372.6                      | 445.5±271.7                       | 548.0±314.7                       | 401.0±186.9                       |
| CK        | d-5      | 279.7±106.2 | 203.8±70.4                       | 211.7±93.3                        | 282.4±174.6                       | 233.7±110.9                       |
|           | d21      | 262.9±48.0  | 199.0±53.1                       | 201.8±46.0                        | 244.2±76.7                        | 219.7±108.6                       |
|           | d44      | 245.0±70.8  | 199.3±34.1                       | 234.0±114.0                       | 217.6±93.2                        | 215.3±103.9                       |
|           | d67      | 226.0±61.6  | 173.8±24.1                       | 165.6±32.9                        | 228.1±80.4                        | 235.7±119.6                       |
| TG        | d-5      | 0.46±0.13   | 0.40±0.17                        | 0.43±0.14                         | 0.41±0.17                         | 0.35±0.11                         |
|           | d21      | 0.36±0.13   | 0.31±0.08                        | 0.36±0.14                         | 0.34±0.13                         | 0.31±0.12                         |
|           | d44      | 0.33±0.14   | 0.26±0.08                        | 0.37±0.12                         | 0.33±0.14                         | 0.27±0.10                         |
|           | d67      | 0.34±0.06   | 0.36±0.07                        | 0.38±0.11                         | 0.49±0.15                         | 0.53±0.21                         |
| CHO       | d-5      | 3.06±0.36   | 3.38±0.63                        | 3.43±0.56                         | 3.35±0.40                         | 3.26±0.57                         |
|           | d21      | 3.74±0.54   | 3.72±0.72                        | 3.85±0.66                         | 3.89±0.83                         | 3.61±0.58                         |
|           | d44      | 3.67±0.46   | 3.76±0.66                        | 3.87±0.57                         | 3.83±0.57                         | 3.71±0.44                         |
|           | d67      | 3.48±0.38   | 3.70±0.45                        | 4.18±0.67                         | 4.20±0.61                         | 4.13±0.70                         |
| CREA      | d-5      | 94.0±19.8   | 89.5±11.5                        | 92.1±16.1                         | 86.2±11.9                         | 93.8±14.1                         |
|           | d21      | 87.9±14.4   | 89.1±13.0                        | 91.8±13.5                         | 94.4±12.9                         | 103.1±16.7                        |
|           | d44      | 85.4±16.3   | 83.2±11.3                        | 91.2±12.0                         | 88.0±12.0                         | 100.6±12.0*                       |
|           | d67      | 86.8±7.5    | 84.6±12.4                        | 105.5±14.0                        | 91.7±13.7                         | 107.8±10.9                        |
| BUN       | d-5      | 7.5±0.9     | 7.8±1.7                          | 7.4±1.2                           | 7.9±1.3                           | 6.1±1.1                           |
|           | d21      | 6.7±1.4     | 7.3±1.9                          | 7.6±1.0                           | 7.7±1.3                           | 7.5±1.4                           |
|           | d44      | 6.4±1.1     | 7.9±2.2                          | 7.3±1.4                           | 7.2±1.7                           | 7.1±1.4                           |
|           | d67      | 6.8±0.8     | 6.0±1.2                          | 6.0±0.8                           | 7.9±1.6                           | 6.4±0.7                           |
| TBIL      | d-5      | 5.6±0.6     | 5.4±0.5                          | 5.4±0.5                           | 5.1±0.5                           | 5.4±0.8                           |
|           | d21      | 7.3±1.3     | 7.2±0.9                          | 7.1±1.8                           | 7.3±1.4                           | 7.5±1.2                           |
|           | d44      | 6.1±1.0     | 6.1±0.7                          | 6.2±0.8                           | 6.4±0.9                           | 6.8±1.0                           |
|           | d67      | 6.7±0.9     | 5.8±0.6                          | 6.9±2.3                           | 6.3±1.1                           | 6.2±1.5                           |
| TP        | d-5      | 78.9±3.9    | 79.1±5.4                         | 80.4±2.9                          | 80.6±4.9                          | 79.9±3.7                          |

| Parameter | Time (d) | Vehicle   | Low-dose                         | Mid-dose                          | High-dose                         | Ad5-null control                  |
|-----------|----------|-----------|----------------------------------|-----------------------------------|-----------------------------------|-----------------------------------|
|           |          |           | 1.0×10 <sup>9</sup><br>VP/animal | 1.0×10 <sup>10</sup><br>VP/animal | 1.0×10 <sup>11</sup><br>VP/animal | 1.0×10 <sup>11</sup><br>VP/animal |
|           | d21      | 80.3±3.4  | 81.5±4.3                         | 81.5±3.8                          | 82.7±5.1                          | 85.3±3.6                          |
|           | d44      | 77.7±4.2  | 80.2±4.7                         | 79.4±4.2                          | 79.7±4.8                          | 83.4±3.9                          |
|           | d67      | 75.9±4.0  | 80.8±5.9                         | 85.3±3.1*                         | 81.4±1.5                          | 90.4±3.5*                         |
| ALB       | d-5      | 55.0±2.3  | 56.0±2.7                         | 56.0±1.3                          | 56.0±3.7                          | 56.3±3.0                          |
|           | d21      | 55.0±1.8  | 57.6±1.7                         | 57.8±2.5*                         | 58.4±3.0**                        | 60.9±2.5**                        |
|           | d44      | 53.9±1.8  | 56.3±2.8                         | 55.3±2.6                          | 55.7±2.8                          | 58.7±2.1**                        |
|           | d67      | 53.4±2.2  | 59.4±2.4*                        | 60.5±2.9*                         | 59.1±2.8*                         | 61.3±2.2*                         |
| GLU       | d-5      | 5.06±1.04 | 5.23±1.24                        | 4.97±1.16                         | 5.06±1.08                         | 5.10±1.15                         |
|           | d21      | 4.63±0.74 | 4.38±0.96                        | 4.61±0.80                         | 4.27±0.91                         | 4.23±0.53                         |
|           | d44      | 5.11±0.98 | 4.99±1.21                        | 5.31±0.99                         | 4.80±0.77                         | 4.98±0.41                         |
|           | d67      | 5.65±0.58 | 4.17±0.55                        | 4.88±1.02                         | 4.92±0.17                         | 5.11±0.99                         |
| GLO       | d-5      | 23.9±3.3  | 23.1±4.2                         | 24.4±2.5                          | 24.6±1.8                          | 23.5±4.6                          |
|           | d21      | 25.3±2.8  | 23.9±4.1                         | 23.7±2.9                          | 24.3±3.9                          | 24.4±4.4                          |
|           | d44      | 23.8±3.5  | 24.0±3.8                         | 24.0±3.4                          | 24.0±3.8                          | 24.7±4.0                          |
|           | d67      | 22.5±2.9  | 21.3±5.3                         | 24.8±2.1                          | 22.4±2.9                          | 29.2±4.7                          |
| A/G       | d-5      | 2.4±0.3   | 2.5±0.5                          | 2.3±0.2                           | 2.3±0.1                           | 2.5±0.5                           |
|           | d21      | 2.2±0.2   | 2.5±0.5                          | 2.5±0.4                           | 2.5±0.4                           | 2.6±0.5                           |
|           | d44      | 2.3±0.3   | 2.4±0.5                          | 2.4±0.4                           | 2.4±0.4                           | 2.4±0.4                           |
|           | d67      | 2.4±0.3   | 3.0±1.0                          | 2.5±0.3                           | 2.7±0.5                           | 2.2±0.4                           |

<sup>a</sup>Data expressed as mean ± SD.

\*  $p < 0.05$  compared with the vehicle control.

\*\*  $p < 0.01$  compared with the vehicle control.
