# Supplementary material for: Immunogenicity of adenovirus-vector vaccine targeting hepatitis B virus: non-clinical safety assessment in non-human primates
Source: Springer Nature journal article supplement (doi:10.1186/s12985-018-1026-3), 2018-07-24
Supplement: MOESM3 [file 15975132]

**Additional file 3: Table S3 Effects of Ad-HBV administration on body temperature**

| Time (d) | N  | Vehicle  | Low-dose<br>1.0×10 <sup>9</sup><br>VP/animal | Mid-dose<br>1.0×10 <sup>10</sup> VP/animal | High-dose<br>1.0×10 <sup>11</sup> VP/animal | Ad5-null control<br>1.0×10 <sup>11</sup><br>VP/animal |
|----------|----|----------|----------------------------------------------|--------------------------------------------|---------------------------------------------|-------------------------------------------------------|
| d-11     | 10 | 39.2±0.5 | 39.4±0.5                                     | 39.1±0.5                                   | 39.2±0.4                                    | 39.5±0.4                                              |
| d-3      | 10 | 39.0±0.4 | 39.3±0.5                                     | 38.8±0.6                                   | 39.0±0.3                                    | 39.3±0.4                                              |
| d5       | 10 | 38.8±0.2 | 39.1±0.4*                                    | 39.2±0.2*                                  | 39.1±0.3*                                   | 39.4±0.3**                                            |
| d12      | 10 | 38.8±0.2 | 39.0±0.3                                     | 39.3±0.4**                                 | 39.3±0.2**                                  | 39.5±0.4**                                            |
| d19      | 10 | 38.7±0.6 | 39.3±0.4*                                    | 39.2±0.3*                                  | 39.3±0.2**                                  | 39.5±0.3**                                            |
| d26      | 10 | 38.7±0.2 | 38.9±0.3                                     | 38.9±0.4                                   | 39.1±0.2**                                  | 39.4±0.4**                                            |
| d33      | 10 | 38.9±0.3 | 39.2±0.3*                                    | 39.2±0.4*                                  | 39.3±0.2**                                  | 39.6±0.3**                                            |
| d40      | 10 | 38.9±0.3 | 39.3±0.3**                                   | 39.3±0.2*                                  | 39.3±0.3*                                   | 39.6±0.4**                                            |
| d45      | 10 | 39.0±0.4 | 39.1±0.4                                     | 39.3±0.2                                   | 39.2±0.2                                    | 39.4±0.4                                              |
| d54      | 4  | 38.8±0.3 | 39.1±0.4                                     | 38.7±0.6                                   | 39.0±0.3                                    | 39.2±0.3                                              |
| d61      | 4  | 39.3±0.3 | 39.3±0.4                                     | 38.9±0.7                                   | 39.5±0.2                                    | 38.9±0.2                                              |
| d67      | 4  | 39.1±0.3 | 39.3±0.5                                     | 39.1±0.6                                   | 39.2±0.1                                    | 39.3±0.3                                              |

<sup>a</sup>Expressed as degrees Celsius (mean ± SD).

\**p* < 0.05 compared with the vehicle control.

\*\**p* < 0.01 compared with the vehicle control.
